# Supplementary material for: Global chemical effects of the microbiome include new bile-acid conjugations
Source: Springer Nature journal article supplement (doi:10.1038/s41586-020-2047-9), 2020-02-26
Supplement: MOESM6 [file 41586_2020_2047_MOESM6_ESM.xlsx]

## Sheet: Sheet1
Sample name	Sample name	SampleID	Organ	Well	RunNum	GFSPF	556.363 355 1 (ID: 4367)	572.357 322 1 (ID: 5588)	522.378 349 1 (ID: 8915)	GF Taurocholic Acid	SPF Taurocholic Acid	GF Glycocholic Acid	SPF Glycocholic Acid			SampleID	Phenylalanocholic acid	Tyrosocholic acid	Leucocholic acid	GF Taurocholic Acid	SPF Taurocholic Acid	GF Glycocholic Acid	SPF Glycocholic Acid
SPF1_Stomach1_BC1_01_21875	SPF1	Stomach1	Stomach	BC1	21875	SPF	0	0	0	209443	0	0	0			Stomach1	1	1	1	470599	1	1	1
SPF2_Stomach1_GC1_01_22116	SPF2	Stomach1	Stomach	GC1	22116	SPF	0	0	0	941005	0	0	0			Stomach2	1	1	1	560505	1	1	1
SPF3_Stomach1_GC1_01_22342	SPF3	Stomach1	Stomach	GC1	22342	SPF	0	0	0	261350	0	0	0			Stomach3	1	1	1	1.53088e+06	295361	1	1
SPF4_Stomach1_GC1_01_22568	SPF4	Stomach1	Stomach	GC1	22568	SPF	0	0	0	1.06301e+06	0	0	0			Gall	1	1	1	3.47481e+06	3682605	26937.1	26937.1
SPF1_Stomach2_BC2_01_21876	SPF1	Stomach2	Stomach	BC2	21876	SPF	0	0	0	895699	0	0	0			Duodenum1	1	1	1	7.65602e+06	4.281e+06	1	61266.3
SPF2_Stomach2_GC2_01_22117	SPF2	Stomach2	Stomach	GC2	22117	SPF	0	0	0	366042	0	0	0			Duodenum2	10929.7	1	1	9.52501e+06	6.99491e+06	1	57732.9
SPF3_Stomach2_GC2_01_22343	SPF3	Stomach2	Stomach	GC2	22343	SPF	0	0	0	397561	0	0	0			Duodenum3	9586.9	1	1	7.32754e+06	3.04915e+06	1	48434.4
SPF4_Stomach2_GC2_01_22569	SPF4	Stomach2	Stomach	GC2	22569	SPF	0	0	0	582720	0	0	0			Duodenum4	20380.4	12658.2	1	5.07715e+06	2.63435e+06	1	16979.2
SPF1_Stomach3_BC3_01_21877	SPF1	Stomach3	Stomach	BC3	21877	SPF	0	0	0	4.04649e+06	132357	0	0			Duodenum5	1	1	1	5.5145e+06	2.44803e+06	1	33716.5
SPF2_Stomach3_GC3_01_22118	SPF2	Stomach3	Stomach	GC3	22118	SPF	0	0	0	354863	73635.1	0	0			Duodenum6	9928.11	1	1	5.23346e+06	1.65377e+06	1	39652.9
SPF3_Stomach3_GC3_01_22344	SPF3	Stomach3	Stomach	GC3	22344	SPF	0	0	0	798105	24623.6	0	0			Jejunum1	1	1	1	4.92121e+06	786817	1	56506.1
SPF4_Stomach3_GC3_01_22570	SPF4	Stomach3	Stomach	GC3	22570	SPF	0	0	0	924075	950828	0	0			Jejunum2	48183	1	13667.8	8.47925e+06	3.87009e+06	12979.9	132991
SPF1_Gall_BB4_01_21864	SPF1	Gall	Gall	BB4	21864	SPF	0	0	0	4.94203e+06	3.15346e+06	14481.9	41065.2			Jejunum3	76429.1	44313	14424.4	1.33046e+07	3.69501e+06	18640.1	158062
SPF2_Gall_GB4_01_22105	SPF2	Gall	Gall	GB4	22105	SPF	0	0	0	5.2239e+06	6.69803e+06	51483	79797.5			Jejunum4	31627.4	9424.18	1	4.69486e+06	820348	1	11927.9
SPF3_Gall_GB4_01_22331	SPF3	Gall	Gall	GB4	22331	SPF	0	0	0	2.7318e+06	3.75936e+06	41783.4	0			Jejunum5	53598.8	21908.5	1	7.18059e+06	2.81734e+06	1	84280.4
SPF4_Gall_GB4_01_22557	SPF4	Gall	Gall	GB4	22557	SPF	0	0	0	1.0015e+06	1.11957e+06	0	0			Jejunum6	129255	57762.4	27570.2	1.04755e+07	8.08477e+06	1	191177
SPF1_Duo1_BC4_01_21878	SPF1	Duo1	Duo	BC4	21878	SPF	0	0	0	5.539e+06	578207	0	67218.5			Ileum1	97642.1	34388.6	9978.41	8.86104e+06	2.8243e+06	38932.4	135811
SPF2_Duo1_GC4_01_22119	SPF2	Duo1	Duo	GC4	22119	SPF	0	0	0	3.16045e+06	7.46497e+06	0	65022.1			Ileum2	46773.2	14391.3	1	8.35039e+06	597551	8920.3	69248
SPF3_Duo1_GC4_01_22345	SPF3	Duo1	Duo	GC4	22345	SPF	0	0	0	1.27989e+07	2.60485e+06	0	79044.3			Ileum3	18381.1	1	1	6.85984e+06	223340	2606.78	17602.7
SPF4_Duo1_GC4_01_22571	SPF4	Duo1	Duo	GC4	22571	SPF	0	0	0	9.12573e+06	6.47597e+06	0	33780.5			Ileum4	21447.2	6396.08	1	8.57767e+06	361165	17799.2	34342.3
SPF1_Duo2_BC5_01_21879	SPF1	Duo2	Duo	BC5	21879	SPF	0	0	0	9.46733e+06	6.73057e+06	0	44740.7			Ileum5	1	1	1	6.7613e+06	341849	0	8538.8
SPF2_Duo2_GC5_01_22120	SPF2	Duo2	Duo	GC5	22120	SPF	0	0	0	8.44227e+06	4.87394e+06	0	100321			Ileum6	1	1	1	5.4372e+06	246496	0	9470.1
SPF3_Duo2_GC5_01_22346	SPF3	Duo2	Duo	GC5	22346	SPF	43718.8	0	0	1.21089e+07	8.02192e+06	0	85870.1			Cecum1	1	1	1	648847	18340.1	0	0
SPF4_Duo2_GC5_01_22572	SPF4	Duo2	Duo	GC5	22572	SPF	0	0	0	8.0815e+06	8.35322e+06	0	0			Cecum2	1	1	1	713474	158641	1	0
SPF1_Duo3_BC6_01_21880	SPF1	Duo3	Duo	BC6	21880	SPF	38347.6	0	0	7.65247e+06	1.77248e+06	0	44482.4			Cecum3	1	1	1	368237	46980.1	1	0
SPF2_Duo3_GC6_01_22121	SPF2	Duo3	Duo	GC6	22121	SPF	0	0	0	7.91615e+06	1.96713e+06	0	62509.5			Cecum4	1	1	1	345195	23828.9	1	0
SPF3_Duo3_GC6_01_22347	SPF3	Duo3	Duo	GC6	22347	SPF	0	0	0	9.28794e+06	2.44309e+06	0	86745.8			Cecum5	1	1	1	605498	39131.1	1	0
SPF4_Duo3_GC6_01_22573	SPF4	Duo3	Duo	GC6	22573	SPF	0	0	0	4.45359e+06	6.01388e+06	0	0			Cecum6	1	1	1	784017	12914.3	0	0
SPF1_Duo4_BC7_01_21881	SPF1	Duo4	Duo	BC7	21881	SPF	0	0	0	1.83274e+06	1.69593e+06	0	67916.9			Colon1	1	1	1	852211	27470.9	1	0
SPF2_Duo4_GC7_01_22122	SPF2	Duo4	Duo	GC7	22122	SPF	0	0	0	6.72662e+06	2.30202e+06	0	0			Colon2	1	1	1	592591	23878	0	0
SPF3_Duo4_GC7_01_22348	SPF3	Duo4	Duo	GC7	22348	SPF	0	0	0	7.9595e+06	350944	0	0			Colon3	1	1	1	583901	19509.2	0	0
SPF4_Duo4_GC7_01_22574	SPF4	Duo4	Duo	GC7	22574	SPF	81521.5	50632.8	0	3.78975e+06	6.18852e+06	0	0			Colon4	1	1	1	886926	31215.1	0	0
SPF1_Duo5_BC8_01_21882	SPF1	Duo5	Duo	BC8	21882	SPF	0	0	0	855806	1.999e+06	0	0			Colon5	1	1	1	348229	0	1	1
SPF2_Duo5_GC8_01_22123	SPF2	Duo5	Duo	GC8	22123	SPF	0	0	0	7.61835e+06	3.2214e+06	0	70119.6			Colon6	1	1	1	208842	7311.8	1	1
SPF3_Duo5_GC8_01_22349	SPF3	Duo5	Duo	GC8	22349	SPF	0	0	0	6.52175e+06	501980	0	64746.5			Stool	1	1	1	505734	1	1	1
SPF4_Duo5_GC8_01_22575	SPF4	Duo5	Duo	GC8	22575	SPF	0	0	0	7.06208e+06	4.06975e+06	0	0
SPF1_Duo6_BC9_01_21883	SPF1	Duo6	Duo	BC9	21883	SPF	39712.5	0	0	868263	720361	0	100204
SPF2_Duo6_GC9_01_22124	SPF2	Duo6	Duo	GC9	22124	SPF	0	0	0	8.4892e+06	3.53644e+06	0	58408.1
SPF3_Duo6_GC9_01_22350	SPF3	Duo6	Duo	GC9	22350	SPF	0	0	0	6.04037e+06	260426	0	0
SPF4_Duo6_GC9_01_22576	SPF4	Duo6	Duo	GC9	22576	SPF	0	0	0	5.53602e+06	2.09785e+06	0	0
SPF1_Jeju1_BC10_01_21884	SPF1	Jeju1	Jeju	BC10	21884	SPF	0	0	0	6.2775e+06	1.14553e+06	0	69294.6
SPF2_Jeju1_GC10_01_22125	SPF2	Jeju1	Jeju	GC10	22125	SPF	0	0	0	1.89286e+06	0	0	0
SPF3_Jeju1_GC10_01_22351	SPF3	Jeju1	Jeju	GC10	22351	SPF	0	0	0	9.54075e+06	2.00174e+06	0	156730
SPF4_Jeju1_GC10_01_22577	SPF4	Jeju1	Jeju	GC10	22577	SPF	0	0	0	1.97373e+06	0	0	0
SPF1_Jeju2_BC11_01_21885	SPF1	Jeju2	Jeju	BC11	21885	SPF	0	0	0	8.96524e+06	4.06992e+06	31694.3	126715
SPF2_Jeju2_GC11_01_22126	SPF2	Jeju2	Jeju	GC11	22126	SPF	0	0	0	2.544e+06	843765	7245.49	0
SPF3_Jeju2_GC11_01_22352	SPF3	Jeju2	Jeju	GC11	22352	SPF	144549	0	41003.4	1.39285e+07	6.69658e+06	0	272258
SPF1_Jeju3_BC12_01_21886	SPF1	Jeju3	Jeju	BC12	21886	SPF	48009.4	26751	0	7.56e+06	4.5665e+06	0	161427
SPF2_Jeju3_GC12_01_22127	SPF2	Jeju3	Jeju	GC12	22127	SPF	257707	150501	57697.4	2.54558e+07	3.16727e+06	74560.4	206261
SPF3_Jeju3_GC12_01_22353	SPF3	Jeju3	Jeju	GC12	22353	SPF	0	0	0	7.97354e+06	5.13877e+06	0	177770
SPF4_Jeju3_GC12_01_22579	SPF4	Jeju3	Jeju	GC12	22579	SPF	0	0	0	1.22292e+07	1.90749e+06	0	86790.6
SPF1_Jeju4_BD1_01_21889	SPF1	Jeju4	Jeju	BD1	21889	SPF	0	0	0	3.27934e+06	1.27501e+06	0	25281.3
SPF2_Jeju4_GD1_01_22130	SPF2	Jeju4	Jeju	GD1	22130	SPF	43262	0	0	1.06583e+07	170786	0	0
SPF3_Jeju4_GD1_01_22356	SPF3	Jeju4	Jeju	GD1	22356	SPF	0	0	0	2.46992e+06	1.13583e+06	0	22430.5
SPF4_Jeju4_GD1_01_22582	SPF4	Jeju4	Jeju	GD1	22582	SPF	83247.7	37696.7	0	2.37187e+06	699760	0	0
SPF1_Jeju5_BD2_01_21890	SPF1	Jeju5	Jeju	BD2	21890	SPF	0	0	0	1.30845e+07	3.15839e+06	0	125850
SPF2_Jeju5_GD2_01_22131	SPF2	Jeju5	Jeju	GD2	22131	SPF	115581	49375.5	0	2.98831e+06	4.81587e+06	0	123815
SPF3_Jeju5_GD2_01_22357	SPF3	Jeju5	Jeju	GD2	22357	SPF	0	0	0	679318	3.05584e+06	0	87456.4
SPF4_Jeju5_GD2_01_22583	SPF4	Jeju5	Jeju	GD2	22583	SPF	98814.1	38258.4	0	1.19702e+07	239252	0	0
SPF1_Jeju6_BD3_01_21891	SPF1	Jeju6	Jeju	BD3	21891	SPF	120364	60963.3	0	1.36641e+07	7.86463e+06	0	189050
SPF2_Jeju6_GD3_01_22132	SPF2	Jeju6	Jeju	GD3	22132	SPF	225871	82819	53240	1.37765e+06	8.92299e+06	0	229650
SPF3_Jeju6_GD3_01_22358	SPF3	Jeju6	Jeju	GD3	22358	SPF	77558.3	30871.4	0	1.13918e+07	6.82413e+06	0	189788
SPF4_Jeju6_GD3_01_22584	SPF4	Jeju6	Jeju	GD3	22584	SPF	93228.5	56396	57040.9	1.54686e+07	8.72731e+06	33654.2	156217
SPF1_Ile1_BD4_01_21892	SPF1	Ile1	Ile	BD4	21892	SPF	158112	61893.6	39913.6	1.3324e+07	2.73228e+06	44108.2	209584
SPF2_Ile1_GD4_01_22133	SPF2	Ile1	Ile	GD4	22133	SPF	49639.4	0	0	200881	5.09611e+06	52112.9	44323.1
SPF3_Ile1_GD4_01_22359	SPF3	Ile1	Ile	GD4	22359	SPF	182817	75660.9	0	1.90399e+07	1.88262e+06	59508.4	289335
SPF4_Ile1_GD4_01_22585	SPF4	Ile1	Ile	GD4	22585	SPF	0	0	0	2.87937e+06	1.58619e+06	0	0
SPF1_Ile2_BD5_01_21893	SPF1	Ile2	Ile	BD5	21893	SPF	85051	57565.2	0	1.10742e+07	0	35681.2	115271
SPF2_Ile2_GD5_01_22134	SPF2	Ile2	Ile	GD5	22134	SPF	0	0	0	1.52396e+06	1.01873e+06	0	0
SPF3_Ile2_GD5_01_22360	SPF3	Ile2	Ile	GD5	22360	SPF	102042	0	0	1.7233e+07	0	0	161721
SPF4_Ile2_GD5_01_22586	SPF4	Ile2	Ile	GD5	22586	SPF	0	0	0	3.57035e+06	1.37147e+06	0	0
SPF1_Ile3_BD6_01_21894	SPF1	Ile3	Ile	BD6	21894	SPF	0	0	0	5.0982e+06	0	10427.1	0
SPF2_Ile3_GD6_01_22135	SPF2	Ile3	Ile	GD6	22135	SPF	0	0	0	3.76729e+06	391213	0	0
SPF3_Ile3_GD6_01_22361	SPF3	Ile3	Ile	GD6	22361	SPF	73524.4	0	0	1.53952e+07	0	0	70410.9
SPF4_Ile3_GD6_01_22587	SPF4	Ile3	Ile	GD6	22587	SPF	0	0	0	3.17864e+06	502145	0	0
SPF1_Ile4_BD7_01_21895	SPF1	Ile4	Ile	BD7	21895	SPF	85788.8	25584.3	0	1.85795e+07	150574	47687.4	93923.8
SPF2_Ile4_GD7_01_22136	SPF2	Ile4	Ile	GD7	22136	SPF	0	0	0	8.90712e+06	947383	23509.2	43445.2
SPF3_Ile4_GD7_01_22362	SPF3	Ile4	Ile	GD7	22362	SPF	0	0	0	2.94551e+06	346703	0	0
SPF4_Ile4_GD7_01_22588	SPF4	Ile4	Ile	GD7	22588	SPF	0	0	0	3.87857e+06	0	0	0
SPF1_Ile5_BD8_01_21896	SPF1	Ile5	Ile	BD8	21896	SPF	0	0	0	5.69415e+06	102920	0	34155.2
SPF2_Ile5_GD8_01_22137	SPF2	Ile5	Ile	GD8	22137	SPF	0	0	0	1.07029e+07	490646	0	0
SPF3_Ile5_GD8_01_22363	SPF3	Ile5	Ile	GD8	22363	SPF	0	0	0	9.09245e+06	669630	0	0
SPF4_Ile5_GD8_01_22589	SPF4	Ile5	Ile	GD8	22589	SPF	0	0	0	1.55573e+06	104202	0	0
SPF1_Ile6_BD9_01_21897	SPF1	Ile6	Ile	BD9	21897	SPF	0	0	0	2.54343e+06	287993	0	37880.4
SPF2_Ile6_GD9_01_22138	SPF2	Ile6	Ile	GD9	22138	SPF	0	0	0	9.00352e+06	122067	0	0
SPF3_Ile6_GD9_01_22364	SPF3	Ile6	Ile	GD9	22364	SPF	0	0	0	7.85914e+06	359134	0	0
SPF4_Ile6_GD9_01_22590	SPF4	Ile6	Ile	GD9	22590	SPF	0	0	0	2.3427e+06	216791	0	0
SPF1_Cecum1_BD10_01_21898	SPF1	Cecum1	Cecum	BD10	21898	SPF	0	0	0	686193	39691	0	0
SPF2_Cecum1_GD10_01_22139	SPF2	Cecum1	Cecum	GD10	22139	SPF	0	0	0	323898	33669.5	0	0
SPF3_Cecum1_GD10_01_22365	SPF3	Cecum1	Cecum	GD10	22365	SPF	0	0	0	656441	0	0	0
SPF4_Cecum1_GD10_01_22591	SPF4	Cecum1	Cecum	GD10	22591	SPF	0	0	0	928855	0	0	0
SPF1_Cecum2_BD11_01_21899	SPF1	Cecum2	Cecum	BD11	21899	SPF	0	0	0	293469	34296.1	0	0
SPF2_Cecum2_GD11_01_22140	SPF2	Cecum2	Cecum	GD11	22140	SPF	0	0	0	164859	53449.9	0	0
SPF3_Cecum2_GD11_01_22366	SPF3	Cecum2	Cecum	GD11	22366	SPF	0	0	0	506380	0	0	0
SPF4_Cecum2_GD11_01_22592	SPF4	Cecum2	Cecum	GD11	22592	SPF	0	0	0	1.88919e+06	546820	0	0
SPF1_Cecum3_BD12_01_21900	SPF1	Cecum3	Cecum	BD12	21900	SPF	0	0	0	128985	45905.9	0	0
SPF2_Cecum3_GD12_01_22141	SPF2	Cecum3	Cecum	GD12	22141	SPF	0	0	0	175326	69743.7	0	0
SPF3_Cecum3_GD12_01_22367	SPF3	Cecum3	Cecum	GD12	22367	SPF	0	0	0	0	0	0	0
SPF4_Cecum3_GD12_01_22593	SPF4	Cecum3	Cecum	GD12	22593	SPF	0	0	0	1.16864e+06	72271	0	0
SPF1_Cecum4_BE1_01_21903	SPF1	Cecum4	Cecum	BE1	21903	SPF	0	0	0	736252	0	0	0
SPF2_Cecum4_GE1_01_22144	SPF2	Cecum4	Cecum	GE1	22144	SPF	0	0	0	243760	33288.9	0	0
SPF3_Cecum4_GE1_01_22370	SPF3	Cecum4	Cecum	GE1	22370	SPF	0	0	0	243229	0	0	0
SPF4_Cecum4_GE1_01_22596	SPF4	Cecum4	Cecum	GE1	22596	SPF	0	0	0	157538	62026.8	0	0
SPF1_Cecum5_BE2_01_21904	SPF1	Cecum5	Cecum	BE2	21904	SPF	0	0	0	1.53014e+06	0	0	0
SPF2_Cecum5_GE2_01_22145	SPF2	Cecum5	Cecum	GE2	22145	SPF	0	0	0	289765	33817	0	0
SPF3_Cecum5_GE2_01_22371	SPF3	Cecum5	Cecum	GE2	22371	SPF	0	0	0	249353	58215.5	0	0
SPF4_Cecum5_GE2_01_22597	SPF4	Cecum5	Cecum	GE2	22597	SPF	0	0	0	352740	64491.9	0	0
SPF1_Cecum6_BE3_01_21905	SPF1	Cecum6	Cecum	BE3	21905	SPF	0	0	0	2.0383e+06	38742.9	0	0
SPF2_Cecum6_GE3_01_22146	SPF2	Cecum6	Cecum	GE3	22146	SPF	0	0	0	135828	0	0	0
SPF3_Cecum6_GE3_01_22372	SPF3	Cecum6	Cecum	GE3	22372	SPF	0	0	0	177918	0	0	0
SPF1_Colon1_BE4_01_21906	SPF1	Colon1	Colon	BE4	21906	SPF	0	0	0	814819	57141.1	0	0
SPF2_Colon1_GE4_01_22147	SPF2	Colon1	Colon	GE4	22147	SPF	0	0	0	180602	21087	0	0
SPF3_Colon1_GE4_01_22373	SPF3	Colon1	Colon	GE4	22373	SPF	0	0	0	801598	0	0	0
SPF4_Colon1_GE4_01_22599	SPF4	Colon1	Colon	GE4	22599	SPF	0	0	0	1.61182e+06	31655.5	0	0
SPF1_Colon2_BE5_01_21907	SPF1	Colon2	Colon	BE5	21907	SPF	0	0	0	157665	28569.6	0	0
SPF2_Colon2_GE5_01_22148	SPF2	Colon2	Colon	GE5	22148	SPF	0	0	0	198454	28504.3	0	0
SPF3_Colon2_GE5_01_22374	SPF3	Colon2	Colon	GE5	22374	SPF	0	0	0	1.51672e+06	0	0	0
SPF4_Colon2_GE5_01_22600	SPF4	Colon2	Colon	GE5	22600	SPF	0	0	0	497527	38438.2	0	0
SPF1_Colon3_BE6_01_21908	SPF1	Colon3	Colon	BE6	21908	SPF	0	0	0	603060	52075.9	0	0
SPF2_Colon3_GE6_01_22149	SPF2	Colon3	Colon	GE6	22149	SPF	0	0	0	380785	0	0	0
SPF3_Colon3_GE6_01_22375	SPF3	Colon3	Colon	GE6	22375	SPF	0	0	0	672335	0	0	0
SPF4_Colon3_GE6_01_22601	SPF4	Colon3	Colon	GE6	22601	SPF	0	0	0	679425	25960.8	0	0
SPF1_Colon4_BE7_01_21909	SPF1	Colon4	Colon	BE7	21909	SPF	0	0	0	1.95336e+06	64759.1	0	0
SPF2_Colon4_GE7_01_22150	SPF2	Colon4	Colon	GE7	22150	SPF	0	0	0	448905	0	0	0
SPF3_Colon4_GE7_01_22376	SPF3	Colon4	Colon	GE7	22376	SPF	0	0	0	218939	0	0	0
SPF4_Colon4_GE7_01_22602	SPF4	Colon4	Colon	GE7	22602	SPF	0	0	0	926497	60101.5	0	0
SPF1_Colon5_BE8_01_21910	SPF1	Colon5	Colon	BE8	21910	SPF	0	0	0	409883	0	0	0
SPF2_Colon5_GE8_01_22151	SPF2	Colon5	Colon	GE8	22151	SPF	0	0	0	252734	0	0	0
SPF3_Colon5_GE8_01_22377	SPF3	Colon5	Colon	GE8	22377	SPF	0	0	0	211251	0	0	0
SPF4_Colon5_GE8_01_22603	SPF4	Colon5	Colon	GE8	22603	SPF	0	0	0	519047	0	0	0
SPF1_Colon6_BE9_01_21911	SPF1	Colon6	Colon	BE9	21911	SPF	0	0	0	493448	29247.2	0	0
SPF2_Colon6_GE9_01_22152	SPF2	Colon6	Colon	GE9	22152	SPF	0	0	0	208276	0	0	0
SPF3_Colon6_GE9_01_22378	SPF3	Colon6	Colon	GE9	22378	SPF	0	0	0	133646	0	0	0
SPF4_Colon6_GE9_01_22604	SPF4	Colon6	Colon	GE9	22604	SPF	0	0	0	0	0	0	0
SPF1_Stool_BA1_01_21845	SPF1	Stool	Stool	BA1	21845	SPF	0	0	0	49720.1	0	0	0
SPF2_Stool_GA1_01_22087	SPF2	Stool	Stool	GA1	22087	SPF	0	0	0	617345	0	0	0
SPF3_Stool_GA1_01_22313	SPF3	Stool	Stool	GA1	22313	SPF	0	0	0	460730	0	0	0
SPF4_Stool_GA1_01_22540	SPF4	Stool	Stool	GA1	22540	SPF	0	0	0	895139	0	0	0
